# Supplementary material
Source: PubMed Central journal article supplement (PMC3035520)

**Suppl. Fig. S1.** Contour plots of the amino-methyl regions of the  $^1\text{H}$ - $^{13}\text{C}$  HSQC NMR spectra of LDL(+) and NEFA-LDL particles partially labeled with  $^{13}\text{C}$ -formaldehyde. The LDL(+) sample was the same used to generate NEFA-enriched LDL. NMR acquisition and processing parameters were identical to those used for the spectra of Figure 1.

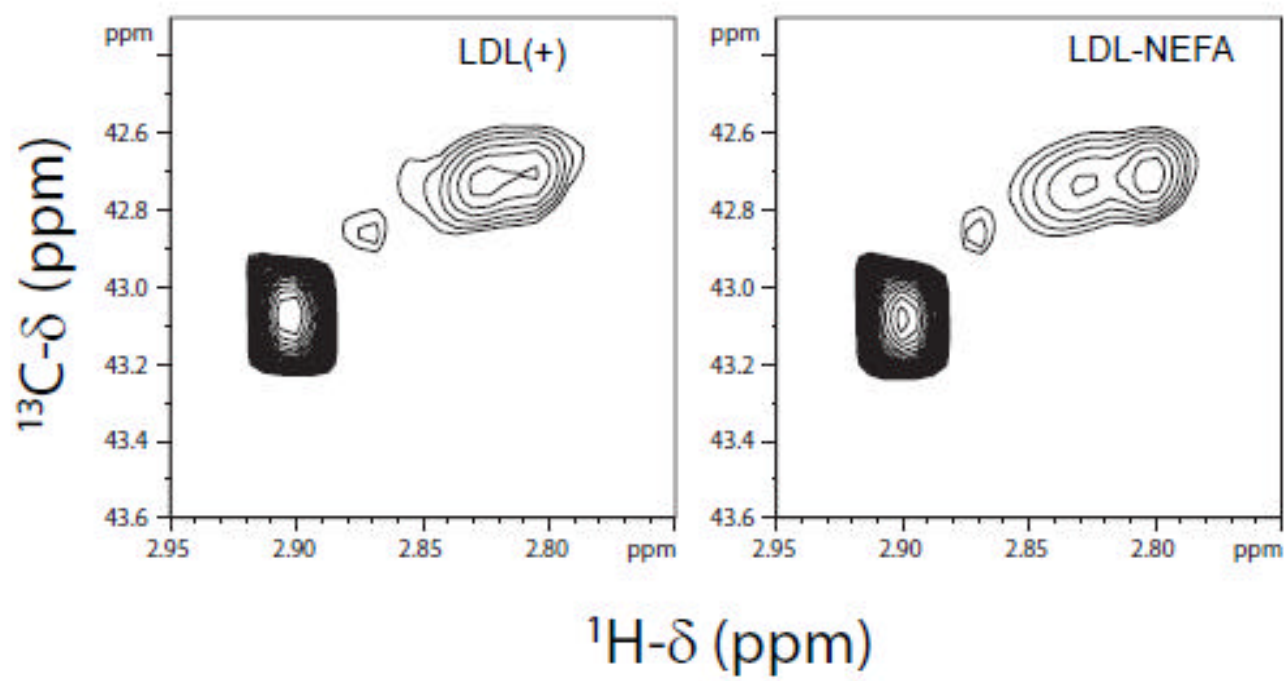

Supplement: supp_D002642_jlr.D002642-1.pdf [file supp_D002642_jlr.D002642-1.pdf]
